# Supplementary material for: Distinct roles for phosphoinositide 3-kinases γ and δ in malignant B cell migration
Source: PubMed Central journal article supplement — Leukemia. 2018 Jan 31;32(9):1958–69. doi: 10.1038/s41375-018-0012-5 (PMC6127087; doi:10.1038/s41375-018-0012-5), 2018-01-31
Supplement: 41375_2018_12_MOESM1_ESM.pdf [file 41375_2018_12_MOESM1_ESM.pdf]

# Figure S1

**A.**

| Gene Symbol | Gene Name                                               |         | Sequence 5' ->3'        | Location  | Amplicon Size | Gene Accession Number        |
|-------------|---------------------------------------------------------|---------|-------------------------|-----------|---------------|------------------------------|
| TBP         | TATA-box-binding protein                                | Forward | CCCGAAACGCCGAATATAATCC  | 560-581   | 80            | <a href="#">NM_003194</a>    |
|             |                                                         | Reverse | AATCAGTGCCGTGGTTCGTG    | 639-620   |               |                              |
| PIK3CD      | Phosphoinositide-3-kinase, catalytic, delta polypeptide | Forward | TCAACTCACAGATCAGCCTCC   | 338-358   | 84            | <a href="#">NM_005026</a>    |
|             |                                                         | Reverse | CGCGAAAGTCGTTCACTTCT    | 421-402   |               |                              |
| PIK3CG      | Phosphoinositide-3-kinase, catalytic, gamma polypeptide | Forward | GGCTACCATGAGCAGCTTACC   | 1000-1020 | 142           | <a href="#">NM_002649</a>    |
|             |                                                         | Reverse | CTGTGAGGTCGGTGTTCGG     | 1141-1123 |               |                              |
| PIK3R5      | Phosphoinositide-3-kinase, regulatory subunit 5         | Forward | CTTCCACGCTACGTGTTGTG    | 383-402   | 124           | <a href="#">NM_001251851</a> |
|             |                                                         | Reverse | TGAAGTTTGAAGAACCGTGTGAG | 506-484   |               |                              |
| PIK3R6      | Phosphoinositide-3-kinase, regulatory subunit 6         | Forward | CACAAGAAGGTCGAGCGAGAT   | 118-138   | 137           | <a href="#">NM_001010855</a> |
|             |                                                         | Reverse | GTGAGCACGTACATTACAGTGT  | 254-233   |               |                              |

**B.**

acaaccggtccgctcctagagatccgacgcgcatctctaggccccgcgccgccccctcgacggacttggtggagaagctcggctactcccctgccccggtaatttgcataaat  
atctcctagtaactatagaggcttaattgtcgataaaagacagataatctgttcttttaatactagctacattttacatgataggcttgatttctataacttcgtatagcatacatta  
tacgaagttataaacagcacaaaaggaaactcaccctaactgtaaagtaattgtgtgtttgagactataagtatcccttggaagaccaccttggtg**NNNNNNNNNNNN**  
**NNNNNNNN**gtttaagagctaagctggaaacagcatagcaagtttaataaggctagtcggttatcaactgaaaaagtggcaccgagtcggtgcttttttctcgagtactagg  
atccattaggtacctac

p110 $\gamma$  Crispr-i targeting sequence #1 - **GTTCCGGCAATAGTTTTGC**

p110 $\gamma$  Crispr-i targeting sequence #2 - **GCTTCCTTCTATTTTTGCTCTTTG**

**Figure S1: DNA sequences of RT qPCR primers and CRISPRi gRNA inserts .**

(A) Table providing qPCR primer sequences along with gene names and symbols, gene sequence accession number, location of primers and length of amplicon. (B) The sequence of the gRNA expression cassette. XbaI and XhoI cloning enzyme sites are underlined. The location of specific p110 $\gamma$  CRISPRi targeting sequences within the expression cassette are shown by bolded NNNs and are shown below.

**Figure S2**

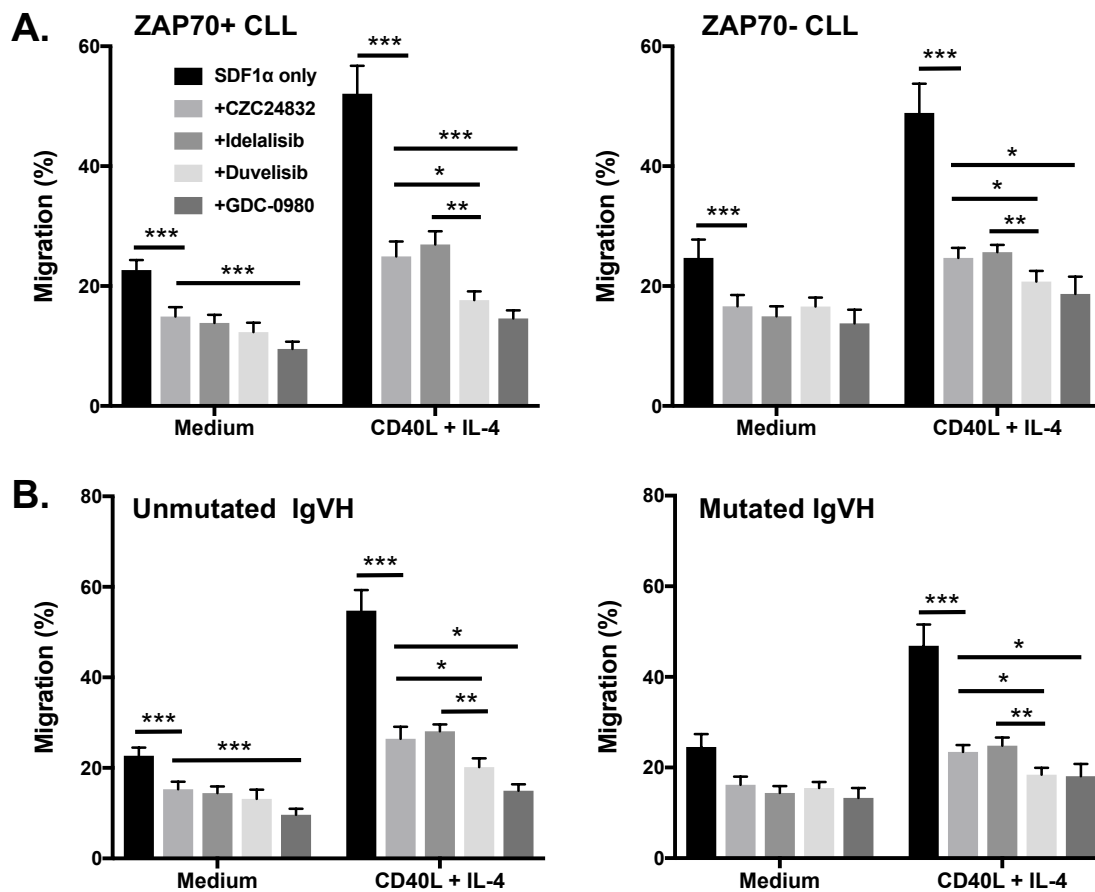

**Figure S2: Impact of PI3K $\gamma$  inhibition on CLL patient samples, stratified by ZAP-70 status and IgVH mutation.**

CLL samples were treated and assessed for migration as described in Figure 1. Results are grouped according to patient ZAP-70 status (**A**) or IgH mutation status (**B**).

## Figure S3

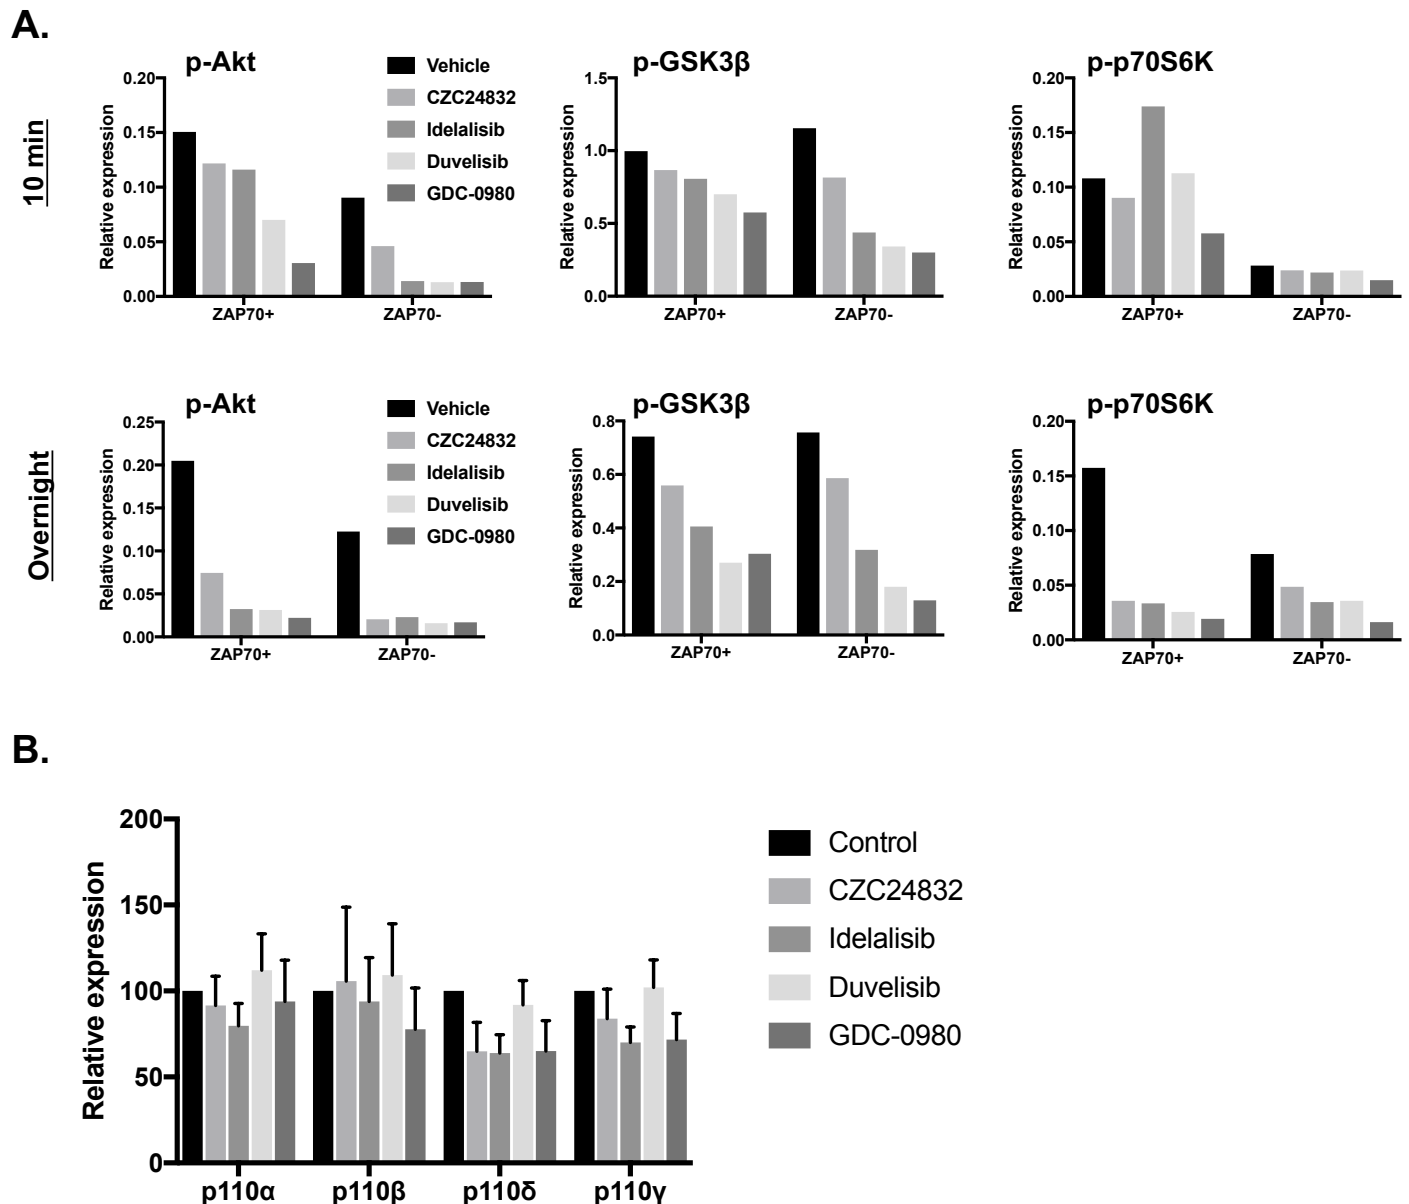

**Figure S3: Impact of different PI3K inhibitors on Akt pathway activity and PI3K isoform expression in CLL cells.**

**(A)** Primary CLL cells were pre-incubated with the inhibitors (1hr) and then cultured in medium containing CD40L + IL4 (50 ng/ml) plus inhibitors for the indicated time points. Whole cell lysates were harvested for simultaneous analysis of phospho-Akt (Ser473), phospho-GSK3 $\beta$ -(Ser9) and phospho-p70S6K (Ser240/244) using Meso Scale Diagnostics Akt Signalling Panel II (Cat#K15177D-1). Results are expressed as relative phospho/total protein ratios. **(B)** CLL cells were treated overnight with the indicated inhibitors and the relative expression of p110 isoforms was measured by qPCR.

## Figure S4

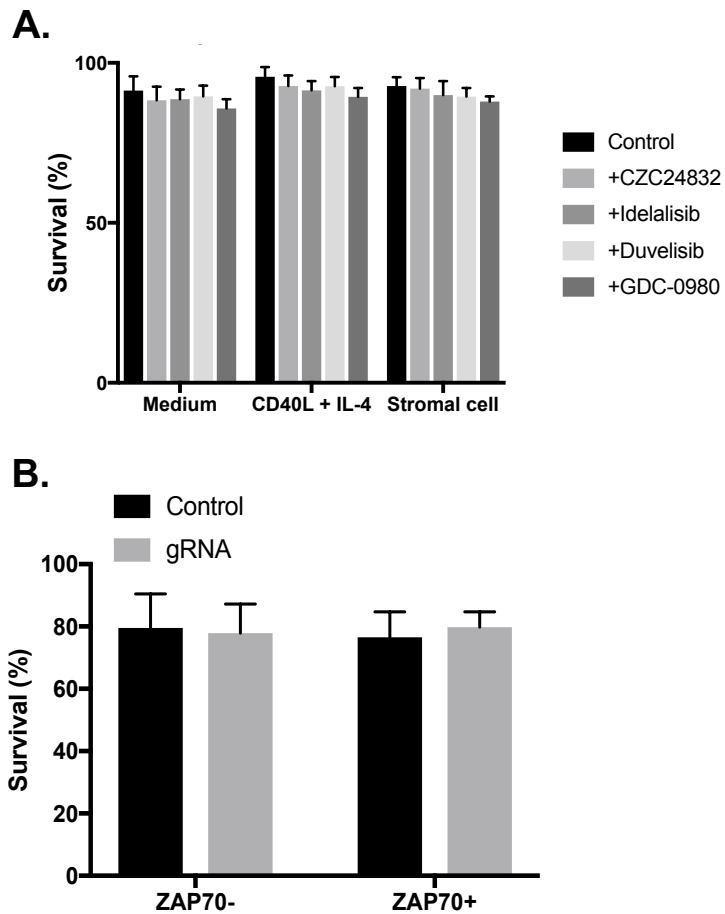

**Figure S4: Survival analysis of CLL cells and malignant B cells for the various experiments conducted in the study.**

(A) Survival of CLL cells after PI3K inhibitor treatment. Cells were cultured under the indicated conditions used for migration or adhesion assays and (B) Survival of CLL cells following PI3K $\gamma$  Crispr-I knockdown.

**Figure S5**

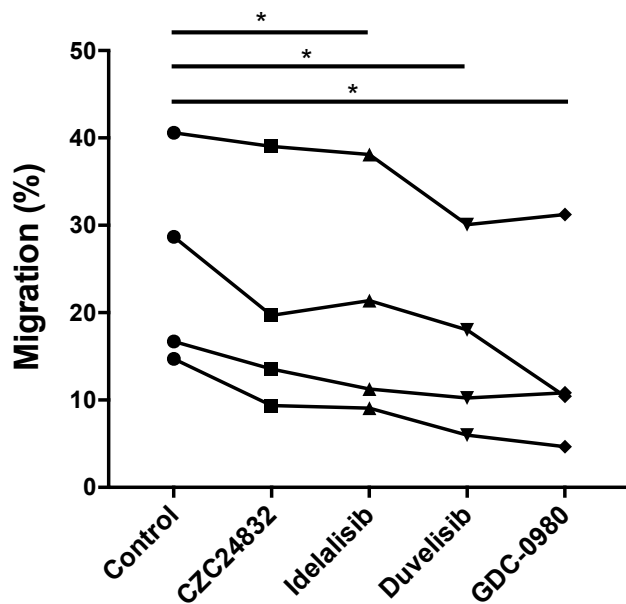

**Figure S5: Impact of PI3K inhibitors on normal human B cell migration.**

Normal B cells were purified from blood, treated with the respective inhibitor as previously described and subjected to a transwell migration assay. Individual subject migration responses are connected by lines.

## Figure S6

**A.**

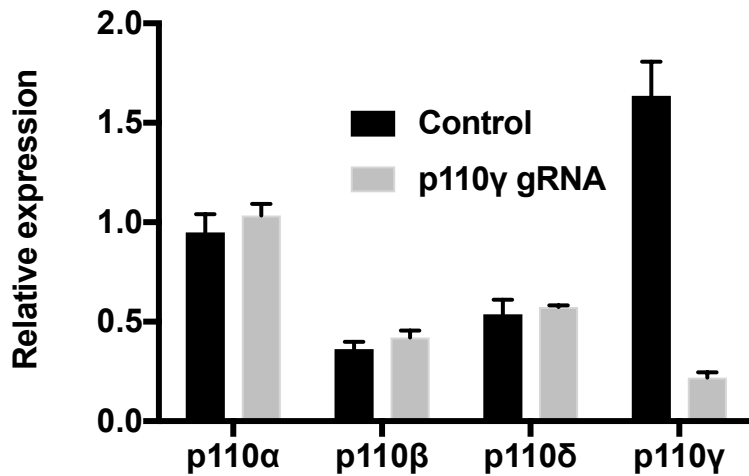

**B.**

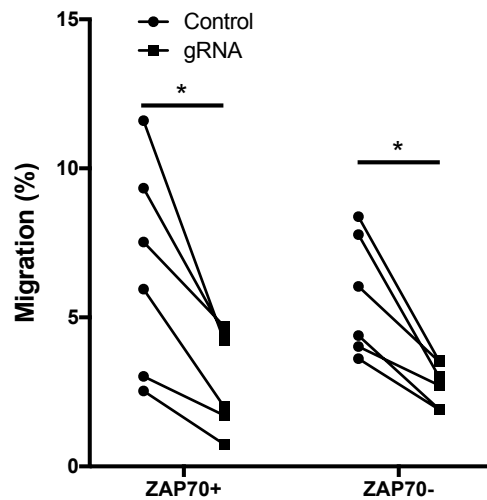

**Figure S6: Effect of Crispr-I knock-down of p110 $\gamma$  on p110 isoform expression and CLL migration.**

(A) Ramos cells were transfected with dCas9-GFP plasmid alone or dCas9-GFP plus p110 $\gamma$  gRNA plasmid and p110 subunit expression was measured by qPCR. (B) CLL cells transfected with dCas9-GFP plasmid alone or dCas9-GFP plus p110 $\gamma$  gRNA were assessed for migration capacity in transwell assay. Patients are grouped according to ZAP70 status.

**Figure S7**

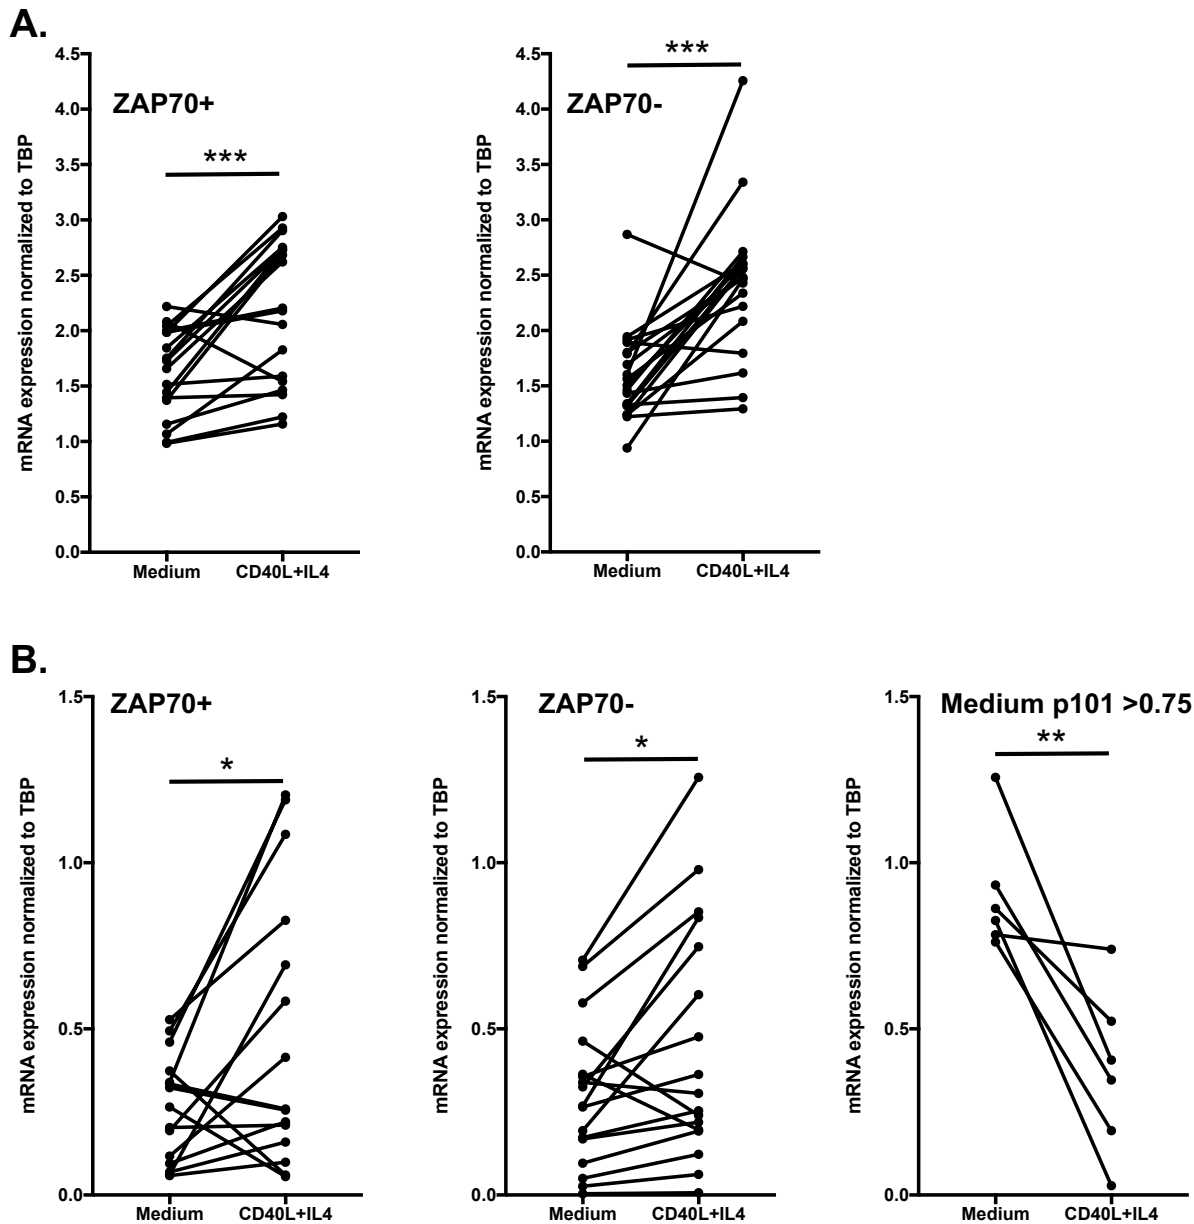

**Figure S7: Paired analysis of CLL patient PI3K $\gamma$  subunit expression with or without CD40L+IL4.**

qPCR data from Figure 3 are graphed with connecting lines linking the same patient cultured in medium versus CD40L+IL4. **(A)** p110 $\gamma$  expression in ZAP70+ or ZAP70- patients. **(B)** p101 expression in ZAP70+ or ZAP70- patients. Left and centre graphs illustrate that the majority of patients show increased p101 expression after stimulation. Outliers showing high p101 without stimulation have been removed and are graphed separately in the right panel; interestingly all of these patients show significant reduction in p101 expression after stimulation. Statistical significance was determined by paired T-test.

**Figure S8**

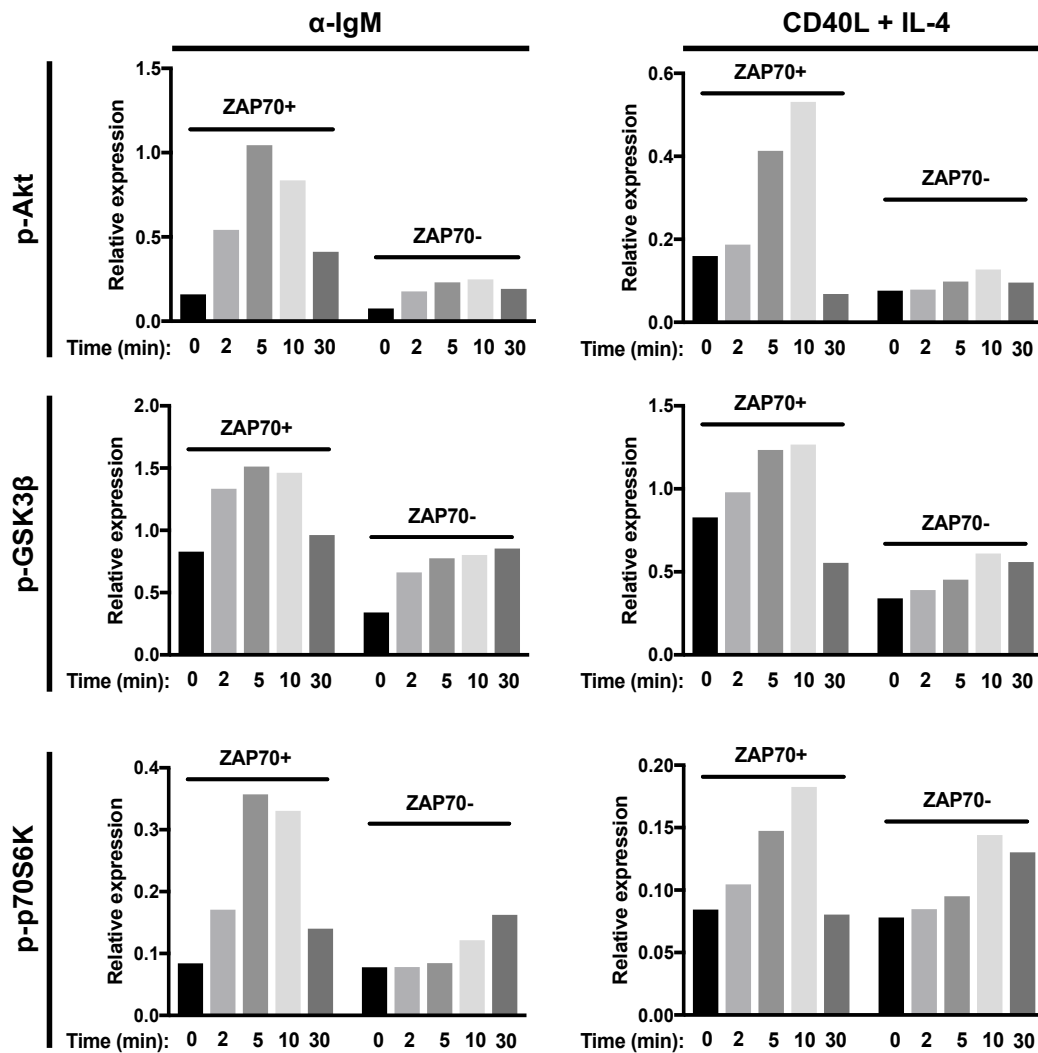

**Figure S8: Confirmation of  $\alpha$ -IgM and CD40L + IL4 stimulation effect on CLL cells.**

CLL cells were stimulated with  $\alpha$ -IgM (10  $\mu$ g/ml) or CD40L + IL4 (50 ng/ml) for the indicated time points. Whole cell lysates were harvested for simultaneous analysis of phospho-Akt (Ser473), phospho-GSK3 $\beta$ -(Ser9) and phospho-p70S6K (Ser240/244) using Meso Scale Diagnostics Akt Signalling Panel II (Cat#K15177D-1). Results are expressed as relative phospho/total protein ratios.

## Figure S9

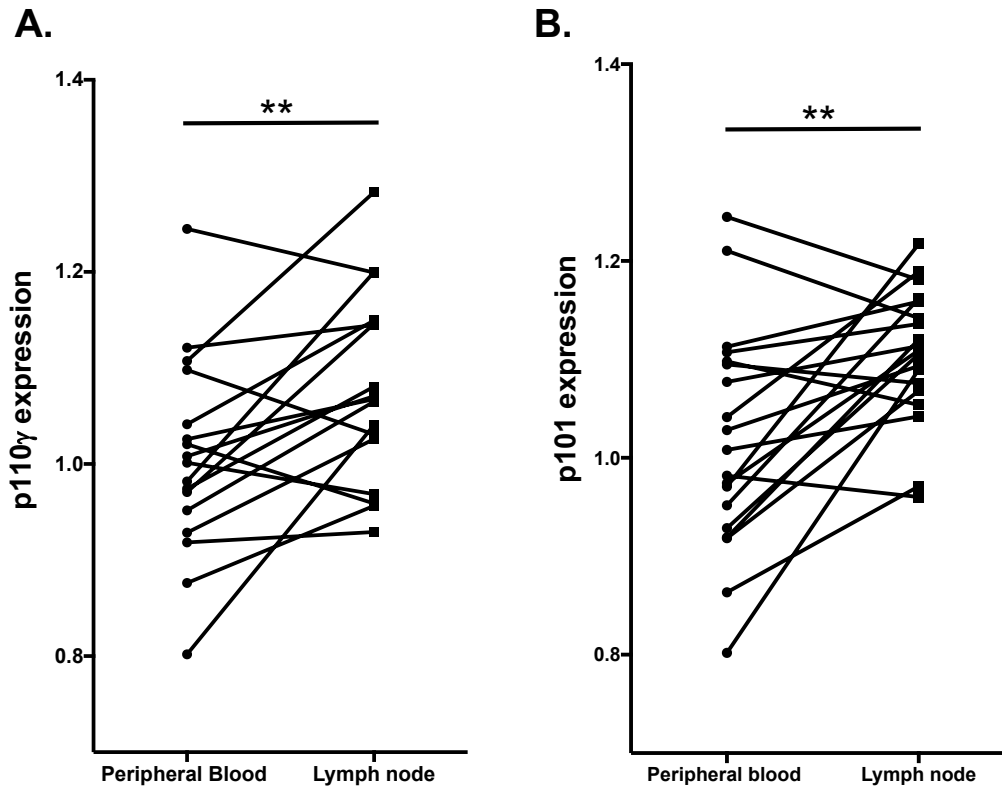

**Figure S9: Microarray data analysis of p110 $\gamma$  and p101 expression in CLL patient blood versus lymph node from the GEO database.**

Expression of (A) p110 $\gamma$  and (B) p101 in CLL isolated from lymph node or peripheral blood. Data were obtained from the GEO database (record # GDS4176), as reported by Herishanu et al (ref 40). Expression of p110 $\gamma$  (PIK3CG) or p101 (PIK3R5) were extracted from the dataset and graphed. Statistical significance was determined by paired T-test.

**Figure S10**

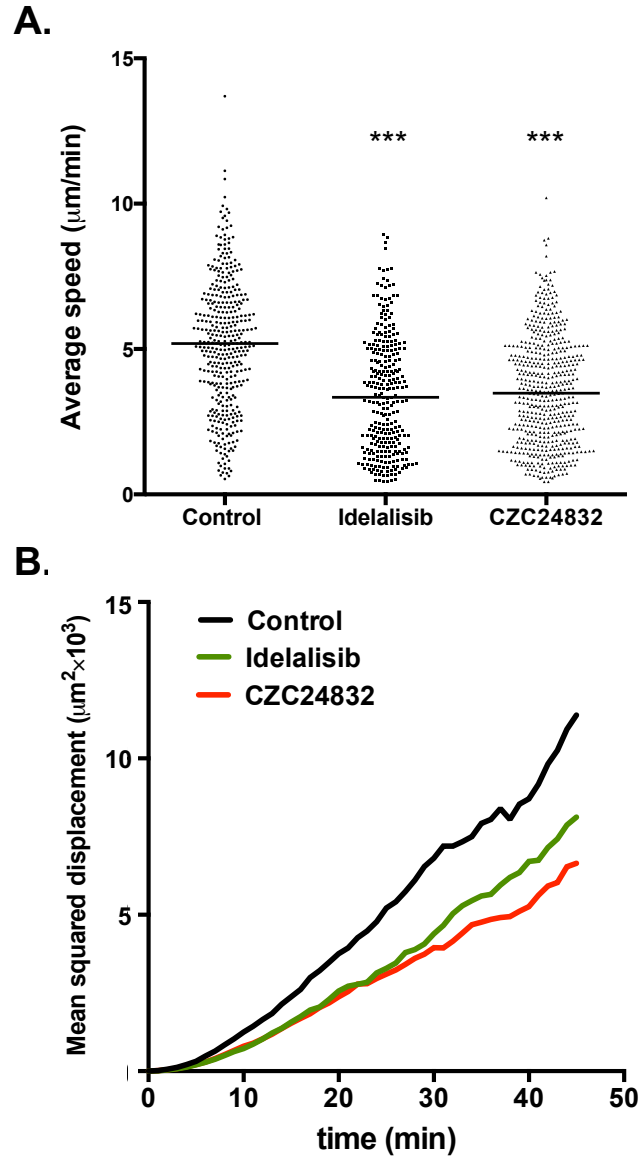

**Figure S10: PI3K $\gamma$  and PI3K $\delta$  inhibition impair Ramos cell migration speed and persistence on a VCAM-1-coated surface.**

Ramos cells were seeded into VCAM-1 coated chamber slides then treated with the indicated inhibitors for 30 minutes. After 100 nM SDF1 $\alpha$  stimulation, time-lapse videos of Ramos cell migration were taken and cell migration tracks analyzed using IMARIS 8.0 software. Migration speed (**A**) and mean squared displacement (**B**) were determined for each migrating cell. \*\*\* $p < 0.001$  by Mann-Whitney test comparing inhibitor treated to control group.
