# Supplementary material for: Distinct roles for phosphoinositide 3-kinases γ and δ in malignant B cell migration
Source: PubMed Central journal article supplement — Leukemia. 2018 Jan 31;32(9):1958–69. doi: 10.1038/s41375-018-0012-5 (PMC6127087; doi:10.1038/s41375-018-0012-5), 2018-01-31
Supplement: 41375_2018_12_MOESM2_ESM.pdf [file 41375_2018_12_MOESM2_ESM.pdf]

| Patient ID | Age at Diagnosis | Gender | ZAP70    | IgVH | CD38 | p110y Medium | p110y CD40L/IL4 | p101 Medium | p101 CD40L/IL4 |
|------------|------------------|--------|----------|------|------|--------------|-----------------|-------------|----------------|
| CLL 1      | 66               | F      | Negative | M    | 3    | 1.2          | 2.6             | 0.1         | 0.19           |
| CLL 2      | 62               | M      | Negative | M    | 0    | 1.4          | 1.6             | 0.19        | 0.6            |
| CLL 3      | 64               | F      | Positive | U    | 0    | 2.1          | 1.5             | 0.93        | 0.35           |
| CLL 4      | 36               | F      | Positive | M    | 3    | 1.2          | 1.3             | 0.06        | 0.1            |
| CLL 5      | 46               | M      | Positive | M    | 0    | 1.9          | 3               | 0.09        | 0.22           |
| CLL 6      | 52               | F      | Negative | M    | 22   | 1.6          | 4.2             | 0.17        | 0.25           |
| CLL 7      | 76               | M      | Positive | U    | 0    | 1.1          | 1.8             | 0.46        | 1.2            |
| CLL 8      | 45               | F      | Positive | U    | 1    | 1.9          | 2.2             | 0.78        | 0.74           |
| CLL 9      | 50               | F      | Negative | M    | 0    | 1.3          | 1.4             | 0.05        | 0.12           |
| CLL 10     | 69               | F      | Negative | M    | 0    | 1.5          | 2.7             | 0.58        | 0.85           |
| CLL 11     | 76               | M      | Negative | M    | 0    | 1.8          | 2.5             | 0.69        | 0.98           |
| CLL 12     | 56               | F      | Negative | M    | 0    | 1.9          | 2.6             | 0.004       | 0.007          |
| CLL 13     | 69               | F      | Positive | M    | 7    | 1.1          | 1.5             | 0.20        | 0.21           |
| CLL 14     | 66               | F      | Positive | U    | 17   | 1.7          | 2.7             | 0.37        | 0.60           |
| CLL 15     | 54               | M      | Negative | M    | 0    | 2.9          | 2.4             | 0.71        | 1.3            |
| CLL 16     | 68               | F      | Negative | U    | 0    | 1.6          | 2.3             | 0.83        | 0.03           |
| CLL 17     | 43               | F      | Negative | U    | 0    | 1.9          | 1.8             | 0.76        | 0.19           |
| CLL 18     | 62               | M      | Negative | U    | 0    | 1.3          | 2.7             | 0.16        | 0.22           |
| CLL 19     | 57               | M      | Positive | U    | 41.6 | 2            | 2.9             | 1.2         | 0.41           |
| CLL 20     | 72               | F      | Negative | M    | 0    | 1.7          | 2.5             | 0.36        | 0.2            |
| CLL 21     | 54               | M      | Positive | U    | 0    | 2            | 2.2             | 0.06        | 0.7            |
| CLL 22     | 78               | F      | Negative | M    | 0    | 1.5          | 2.6             | 0.32        | 0.75           |
| CLL 23     | 50               | F      | Positive | M    | 0    | 0.99         | 1.2             | 0.12        | 0.41           |
| CLL 24     | 60               | M      | Positive | U    | 0    | 1.5          | 1.6             | 0.07        | 0.16           |
| CLL 25     | 66               | M      | Positive | U    | 35   | 1.8          | 2.7             | 0.53        | 0.83           |
| CLL 26     | 69               | F      | Positive | M    | 0    | 1.6          | 2.6             | 0.33        | 0.26           |
| CLL 27     | 52               | M      | Positive | U    | 0    | 2.2          | 2.1             | 0.32        | 0.25           |
| CLL 28     | 70               | M      | Negative | M    | 0    | 1.3          | 2.6             | 0.36        | 0.48           |
| CLL 29     | 60               | F      | Positive | U    | 65   | 1.4          | 2.7             | 0.86        | 0.52           |
| CLL 30     | 62               | F      | Negative | M    | 0    | 0.94         | 2.6             | 0.03        | 0.06           |
| CLL 31     | 47               | M      | Negative | M    | 2    | 1.8          | 3.3             | 0.27        | 0.83           |
| CLL 32     | 56               | M      | Negative | M    | 45   | 1.9          | 2.3             | 0.26        | 0.36           |
| CLL 33     | 54               | M      | Positive | U    | 45   | 1.4          | 1.4             | 0.19        | 0.58           |
| CLL 34     | 71               | F      | Positive | U    | 32   | 1.4          | 2.7             | 0.09        | 0.6            |
| CLL 35     | 53               | M      | Negative | M    | 0    | 1.3          | 2.1             | 0.34        | 0.31           |
| CLL 36     | 72               | M      | Positive | U    | 2    | 0.98         | 1.2             | 0.26        | 0.56           |
| CLL 37     | 52               | M      | Positive | M    | 4    | 1.6          | 0.18            | 0.34        | 1.2            |
| CLL 38     | 62               | M      | Positive | M    | 3    | 1.7          | 2.6             | 0.49        | 1.1            |
| CLL 39     | 58               | M      | Negative | M    | 0    |              |                 |             |                |
| CLL 40     | 57               | M      | Positive | U    | POS  |              |                 |             |                |
| CLL 41     | 63               | M      | Negative | U    | 0    |              |                 |             |                |
| CLL 42     | 59               | M      | Positive | U    | 57   |              |                 |             |                |
| CLL 43     | 61               | F      | Positive | U    | 13   |              |                 |             |                |
| CLL 44     | 60               | F      | Negative | M    | 0    |              |                 |             |                |
| CLL 45     | 62               | F      | Negative | M    | 0    |              |                 |             |                |
| CLL 46     | 61               | M      | Positive | U    | 0    |              |                 |             |                |
| CLL 47     | 65               | F      | Negative | M    | 75   |              |                 |             |                |
| CLL 48     | 80               | F      | Negative | U    | 0    |              |                 |             |                |
| CLL 49     | 65               | F      | Positive | U    | 0    |              |                 |             |                |
| CLL 50     | 65               | M      | Negative | U    | 0    |              |                 |             |                |
| CLL 51     | 56               | M      | Negative | M    | 50.5 |              |                 |             |                |
| CLL 52     | 54               | F      | Negative | M    | 0    |              |                 |             |                |
| CLL 53     | 76               | M      | Positive | U    | 45   |              |                 |             |                |
| CLL 54     | 59               | F      | Negative | M    | 0    |              |                 |             |                |
| CLL 55     | 59               | F      | Positive | U    | 49   |              |                 |             |                |
| CLL 56     | 59               | F      | Negative | M    | 0    |              |                 |             |                |
| CLL 57     | 44               | F      | Negative | M    | 0    |              |                 |             |                |
| CLL 58     | 64               | F      | Positive | U    | 0    |              |                 |             |                |
| CLL 59     | 77               | F      | Negative | U    | 8    |              |                 |             |                |
| CLL 60     | 73               | M      | Positive | U    | 0    |              |                 |             |                |
| CLL 61     | 56               | M      | Positive | M    | 50   |              |                 |             |                |
| CLL 62     | 63               | M      | Negative | M    | 0    |              |                 |             |                |
| CLL 63     | 40               | M      | Negative | M    | 0    |              |                 |             |                |
| CLL 64     | 60               | M      | Positive | U    | 0    |              |                 |             |                |
| CLL 65     | 64               | M      | Negative | M    | 1    |              |                 |             |                |
| CLL 66     | 60               | M      | Negative | M    | 0    |              |                 |             |                |
| CLL 67     | 72               | M      | Positive | U    | 0    |              |                 |             |                |
| CLL 68     | 60               | M      | Positive | U    | 0    |              |                 |             |                |
| CLL 69     | 75               | M      | Positive | U    | 38   |              |                 |             |                |
| CLL 70     | 56               | M      | Negative | M    | 0    |              |                 |             |                |
| CLL 71     | 58               | M      | Positive | U    | 0    |              |                 |             |                |
| CLL 72     | 73               | M      | Positive | M    | 0    |              |                 |             |                |
| CLL 73     | 67               | F      | Positive | U    | 36   |              |                 |             |                |
| CLL 74     | 61               | M      | Negative | U    | 8    |              |                 |             |                |
| CLL 75     | 54               | M      | Positive | U    | POS  |              |                 |             |                |
| CLL 76     | 69               | F      | Negative | M    | 61   |              |                 |             |                |
| CLL 77     | 57               | M      | Positive | M    | 0    |              |                 |             |                |
| CLL 78     | 75               | M      | Positive | U    | 90   |              |                 |             |                |
| CLL 79     | 56               | M      | Positive | U    | 65   |              |                 |             |                |
| CLL 80     | 72               | F      | Positive | U    | 27   |              |                 |             |                |
| CLL 81     | 55               | M      | Negative | U    | 10   |              |                 |             |                |
| CLL 82     | 74               | M      | Negative | M    | 0    |              |                 |             |                |
| CLL 83     | 50               | M      | Positive | U    | 0    |              |                 |             |                |
| CLL 84     | 59               | M      | Positive | U    | 30   |              |                 |             |                |
